# Supplementary material for: Serum 25-hydroxyvitamin D response to vitamin D supplementation in infants: a systematic review and meta-analysis of clinical intervention trials
Source: Springer Nature journal article supplement (doi:10.1007/s00394-019-01912-x), 2019-02-05
Supplement: MOESM5 [file 16444020]

**Supplemental Table 2: Risk of bias summary for non-RCTs Before-after studies: review authors‘ judgements about each risk of bias item for each included study**

|  |  |  |  |  |  |  |  |
| --- | --- | --- | --- | --- | --- | --- | --- |
| **AUTHOR (YEAR)** | **BIAS DUE TO CONFOUNDING** | **BIAS IN SELECTION OF PARTICIPANTS INTO STUDY** | **BIAS IN CLASSIFICATION**  **OF INTERVENTIONS** | **BIAS DUE TO DEVIATIONS**  **FROM INTENDED INTERVENTION** | **BIAS DUE**  **TO MISSING**  **DATA** | **BIAS IN MEASUREMENT**  **OF OUTCOMES** | **BIAS IN SELECTION OF THE REPORTED RESULT** |
| Abrams 2012 | MODERATE  No data on solar UVB exposure | LOW  Group assignment according to ethnicity | LOW  Vit. D administration is a well-defined measure of rickets prevention | LOW  No systematic deviation from intended intervention | LOW  No losses to FU | LOW  25OHD is an objective biochemical parameter | LOW  25OHD is a well-defined measure |
| Ala-Houhala 1985 | MODERATE  No data on solar UVB exposure | LOW  Randomized group assignment | LOW  Vit. D administration is a well-defined measure of rickets prevention | LOW  No systematic deviation from intended intervention | LOW  No losses to FU | LOW  25OHD is an objective biochemical parameter | LOW  25OHD is a well-defined measure |
| Ala-Houhala 1986 | MODERATE  No data on solar UVB exposure | MODERATE  Group assignment in succession | LOW  Vit. D administration is a well-defined measure of rickets prevention | LOW  No systematic deviation from intended intervention | LOW  No losses to FU | LOW  25OHD is an objective biochemical parameter | LOW  25OHD is a well-defined measure |
| Anderson-Berry 2017 | MODERATE  No data on solar UVB exposure | LOW  Randomized group assignment | LOW  Vit. D administration is a well-defined measure of rickets prevention | LOW  No systematic deviation from intended intervention | SERIOUS  33% missing at FU | LOW  25OHD is an objective biochemical parameter | LOW  25OHD is a well-defined measure |
| Backström 1999 | MODERATE  No data on solar UVB exposure or vitamin D in formula diet | LOW  Randomized group assignment | LOW  Vit. D administration is a well-defined measure of rickets prevention | LOW  No systematic deviation from intended intervention | SERIOUS  40%missing at baseline, 25% missing at FU | LOW  25OHD is an objective biochemical parameter | LOW  25OHD is a well-defined measure |
| Bozkurt 2017 | MODERATE  No data on solar UVB exposure | LOW  Randomized group assignment | LOW  Vit. D administration is a well-defined measure of rickets prevention | LOW  No systematic deviation from intended intervention | LOW  No losses to FU | LOW  25OHD is an objective biochemical parameter | LOW  25OHD is a well-defined measure |
| Delvin 2005 | MODERATE  No data on solar UVB exposure | Moderate  No masking strategy | LOW  Vit. D administration is a well-defined measure of rickets prevention | LOW  No systematic deviation from intended intervention | LOW  No losses to FU | LOW  25OHD is an objective biochemical parameter | LOW  25OHD is a well-defined measure |
| Gallo 2013 | MODERATE  No data on solar UVB exposure | LOW  Randomized group assignment | LOW  Vit. D administration is a well-defined measure of rickets prevention | LOW  No systematic deviation from intended intervention | MODERATE  up to 14% missing at FU | LOW  25OHD is an objective biochemical parameter | LOW  25OHD is a well-defined measure |
| Gallo 2013 | MODERATE  No data on solar UVB exposure | LOW  Randomized group assignment | LOW  Vit. D administration is a well-defined measure of rickets prevention | LOW  No systematic deviation from intended intervention | MODERATE  up to 15% missing at baseline, up to 18% missing at FU | LOW  25OHD is an objective biochemical parameter | LOW  25OHD is a well-defined measure |
| Grant 2014 | MODERATE  No data on solar UVB exposure | LOW  Randomized group assignment | LOW  Vit. D administration is a well-defined measure of rickets prevention | LOW  No systematic deviation from intended intervention | MODERARE  8% missing at baseline, 18% missing at FU | LOW  25OHD is an objective biochemical parameter | LOW  25OHD is a well-defined measure |
| Greer 1981 | MODERATE  No data on solar UVB exposure | LOW  Randomized group assignment | LOW  Vit. D administration is a well-defined measure of rickets prevention | LOW  No systematic deviation from intended intervention | LOW  No losses to FU | LOW  25OHD is an objective biochemical parameter | LOW  25OHD is a well-defined measure |
| Greer 1989 | MODERATE  No data on solar UVB exposure | LOW  Randomized group assignment | LOW  Vit. D administration is a well-defined measure of rickets prevention | LOW  No systematic deviation from intended intervention | LOW  No losses to FU | LOW  25OHD is an objective biochemical parameter | LOW  25OHD is a well-defined measure |
| Hillman 1985 | MODERATE  No data on solar UVB exposure | MODERATE  No masking strategy | LOW  Vit. D administration is a well-defined measure of rickets prevention | LOW  No systematic deviation from intended intervention | SERIOUS  Up to 33%missing at FU | LOW  25OHD is an objective biochemical parameter | LOW  25OHD is a well-defined measure |
| Hillman 1985 | MODERATE  No data on solar UVB exposure | MODERATE  No masking strategy | LOW  Vit. D administration is a well-defined measure of rickets prevention | LOW  No systematic deviation from intended intervention | SERIOUS  26%missing at FU | LOW  25OHD is an objective biochemical parameter | LOW  25OHD is a well-defined measure |
| Holmlund-Suila 2012 | MODERATE  No data on solar UVB exposure | LOW  Randomized group assignment | LOW  Vit. D administration is a well-defined measure of rickets prevention | LOW  No systematic deviation from intended intervention | MODERATE  Up to 17% missing at FU | LOW  25OHD is an objective biochemical parameter | LOW  25OHD is a well-defined measure |
| Huynh 2017 | MODERATE  No data on solar UVB exposure | LOW  Randomized group assignment | LOW  Vit. D administration is a well-defined measure of rickets prevention | LOW  No systematic deviation from intended intervention | LOW  No losses to FU | LOW  25OHD is an objective biochemical parameter | LOW  25OHD is a well-defined measure |
| Kim 2010 | MODERATE  No data on solar UVB exposure | MODERATE  No masking strategy | LOW  Vit. D administration is a well-defined measure of rickets prevention | LOW  No systematic deviation from intended intervention | MODERATE  17% missing at baseline, 24% missing at FU | LOW  25OHD is an objective biochemical parameter | LOW  25OHD is a well-defined measure |
| Koo 1995 | MODERATE  No data on solar UVB exposure | LOW  Randomized group assignment | LOW  Vit. D administration is a well-defined measure of rickets prevention | LOW  No systematic deviation from intended intervention | LOW  No losses to FU | LOW  25OHD is an objective biochemical parameter | LOW  25OHD is a well-defined measure |
| Madar 2009 | MODERATE  No data on solar UVB exposure | LOW  Randomized group assignment | LOW  Vit. D administration is a well-defined measure of rickets prevention | LOW  No systematic deviation from intended intervention | LOW  No losses to FU | LOW  25OHD is an objective biochemical parameter | LOW  25OHD is a well-defined measure |
| Mathur 2016 | MODERATE  No data on solar UVB exposure | LOW  Randomized group assignment | LOW  Vit. D administration is a well-defined measure of rickets prevention | LOW  No systematic deviation from intended intervention | LOW  No losses to FU | LOW  25OHD is an objective biochemical parameter | LOW  25OHD is a well-defined measure |
| Natarajan 2013 | MODERATE  No data on solar UVB exposure | LOW  Randomized group assignment | LOW  Vit. D administration is a well-defined | LOW  No systematic deviation from intended intervention | MODERATE  Up to 13% missing at FU | LOW  25OHD is an objective | LOW  25OHD is a well-defined measure |
| Robinson 1981 | MODERATE  No data on solar UVB exposure | LOW  Randomized group assignment | LOW  Vit. D administration is a well-defined measure of rickets prevention | LOW  No systematic deviation from intended intervention | LOW  No losses to FU | LOW  25OHD is an objective biochemical parameter | LOW  25OHD is a well-defined measure |
| Saadi 2009 | MODERATE  No data on solar UVB exposure | LOW  Randomized group assignment | LOW  Vit. D administration is a well-defined measure of rickets prevention | LOW  No systematic deviation from intended intervention | LOW  No losses to FU | LOW  25OHD is an objective biochemical parameter | LOW  25OHD is a well-defined measure |
| Siafarikas 2011 | MODERATE  No data on solar UVB exposure | LOW  Randomized group assignment | LOW  Vit. D administration is a well-defined measure of rickets prevention | LOW  No systematic deviation from intended intervention | SERIOUS  30% missing at FU | LOW  25OHD is an objective biochemical parameter | LOW  25OHD is a well-defined measure |
| Specker 1992 | MODERATE  No data on solar UVB exposure | LOW  Randomized group assignment | LOW  Vit. D administration is a well-defined measure of rickets prevention | LOW  No systematic deviation from intended intervention | LOW  No losses to FU | LOW  25OHD is an objective biochemical parameter | LOW  25OHD is a well-defined measure |
| Tergestina 2014 | MODERATE  No data on solar UVB exposure | MODERATE  No masking strategy | LOW  Vit. D administration is a well-defined measure of rickets prevention | LOW  No systematic deviation from intended intervention | LOW  No losses to FU | LOW  25OHD is an objective biochemical parameter | LOW  25OHD is a well-defined measure |
| Ziegler 2014 | MODERATE  No data on solar UVB exposure | LOW  Randomized group assignment | LOW  Vit. D administration is a well-defined measure of rickets prevention | LOW  No systematic deviation from intended intervention | MODERATE  Up to 15% missing at baseline | LOW  25OHD is an objective biochemical parameter | LOW  25OHD is a well-defined measure |
